# Supplementary material for: Physician Characteristics Associated With Ordering 4 Low-Value Screening Tests in Primary Care
Source: PubMed Central journal article supplement (PMC6324437; doi:10.1001/jamanetworkopen.2018.3506), 2018-10-12

## Supplementary Online Content

Bouck Z, Ferguson J, Ivers NM, et al. Physician characteristics associated with ordering 4 low-value screening tests in primary care. *JAMA Netw Open*. 2018;1(6):e183506. doi:10.1001/jamanetworkopen.2018.3506

**eTable 1.** Cohort Creation (Denominator) and Outcome Definitions (Numerator) per Recommendation

**eTable 2.** Baseline Characteristics by Number of Tests With 50+ Opportunities (n = 11,448)

**eTable 3.** Observed and Expected Frequency Distribution of Physicians Based on Cross-Test Score and Frequently Used Test(s)

**eTable 4.** Results of Mixed-Effects Multinomial Logistic Regression (n = 2,340)

**eFigure.** Frequency Distributions for Unadjusted Physician-Level Ordering Rates for Repeat DXA Scans, ECGs, Pap Tests, and CXRs

This supplementary material has been provided by the authors to give readers additional information about their work.

**eTable 1.** Cohort Creation (Denominator) and Outcome Definitions (Numerator) per Recommendation

| <b>Recommendation</b>                                                                                                   | <b>Denominator</b>                                                                                                                                                                                                                                                                                                                               | <b>Numerator</b>                                                                                                                                                                                                                              |
|-------------------------------------------------------------------------------------------------------------------------|--------------------------------------------------------------------------------------------------------------------------------------------------------------------------------------------------------------------------------------------------------------------------------------------------------------------------------------------------|-----------------------------------------------------------------------------------------------------------------------------------------------------------------------------------------------------------------------------------------------|
| Don't repeat DXA scans more often than every two years in the absence of high-risk or new risk factors <sup>23,24</sup> | <i>Inclusion criteria:</i> Prior baseline, low-risk, or high-risk DXA scan <sup>7</sup> .<br><br><i>Exclusion criteria:</i> Age <40 or >105 yr on date of scan <sup>7</sup> .                                                                                                                                                                    | Patients meet inclusion and exclusion criteria with claim for subsequent DXA scan within 2 years of prior scan <sup>7</sup> .                                                                                                                 |
| Don't ordering screening electrocardiograms (ECGs) for asymptomatic or low-risk outpatients <sup>21,22</sup>            | <i>Inclusion criteria:</i> Periodic health visit with a primary care physician <sup>14</sup> .<br><br><i>Exclusion criteria:</i> Prior diagnosis or recent symptoms suggestive of cardiovascular disease; prior cardiac procedures; high-risk comorbidities; age <18 or >105 yr <sup>14</sup> .                                                  | Patients meet inclusion and exclusion criteria with receipt of an ECG within 30 days of periodic health visit <sup>14</sup> .<br><br>Exclude any ECGs that occur during an emergency department visit from the numerator only <sup>b</sup> .  |
| Don't order routine chest X-rays (CXRs) for asymptomatic or low-risk outpatients <sup>22</sup>                          | <i>Inclusion criteria:</i> Periodic health visit with a primary care physician <sup>15</sup> .<br><br><i>Exclusion criteria:</i> Prior diagnosis or recent symptoms suggestive of cardiopulmonary disease; prior cardiac procedures; consultations with cardiopulmonary specialists; high-risk comorbidities; age <18 or >105 yr <sup>15</sup> . | Patients meet inclusion and exclusion criteria with claim for CXR within 7 days of periodic health visit <sup>15</sup> .<br><br>Exclude any CXRs done during inpatient stay or emergency department visit from numerator only <sup>15</sup> . |
| Don't screen women with Pap smears if under 21 years of age or over 69 years of age <sup>22</sup>                       | <i>Inclusion criteria:</i> Periodic health visit with a primary care physician <sup>b</sup> .<br><br><i>Exclusion criteria:</i> Previous gynecologic cancer diagnosis; previous hysterectomy; recent pregnancy; HIV infection age <13 or >105 yr; age ≥21 or ≤69; male sex <sup>7</sup> .                                                        | Patient meets inclusion and exclusion criteria with claim for cervical cancer screening with Pap smear within 7 days of periodic health visit <sup>7</sup> .                                                                                  |

*Notes:* DXA = dual-energy X-ray absorptiometry; ECG = electrocardiogram; Pap = Papanicolaou; CXR = chest X-ray; HIV = human immunodeficiency virus.

<sup>a</sup> Both components of the same CW recommendation; however, split to reflect independent measurement, which is consistent with preceding studies.

<sup>b</sup> Represent methodological deviations from referenced studies.

**eTable 2.** Baseline Characteristics by Number of Tests With 50+ Opportunities (n = 11,448)

| Characteristic                       | Number of tests with 50+ opportunities |              |              | P value <sup>a</sup> |
|--------------------------------------|----------------------------------------|--------------|--------------|----------------------|
|                                      | 0                                      | 1-3          | 4            |                      |
|                                      | N=2,763                                | N=6,291      | N=2,394      |                      |
| Age, median (IQR)                    | 46 (34-60)                             | 49 (38-58)   | 51 (44-58)   | <.001 <sup>b</sup>   |
| Missing (n, %)                       | 310 (11.2)                             | 282 (4.5%)   | 0 (0.0%)     |                      |
| Years since graduation, median (IQR) | 16 (4-32)                              | 22 (9-31)    | 25 (17-32)   | <.001 <sup>b</sup>   |
| Missing (n, %)                       | 43 (1.6)                               | 16 (0.2)     | 0 (0.0)      |                      |
| Sex, n (%)                           |                                        |              |              | <.001                |
| Male                                 | 1,500 (54.3)                           | 3,412 (54.2) | 1,193 (49.8) |                      |
| Female                               | 1,225 (44.3)                           | 2,864 (45.5) | 1,201 (50.2) |                      |
| Missing                              | 38 (1.4)                               | 15 (0.2)     | 0 (0.0)      |                      |
| IMG, n (%)                           |                                        |              |              | <.001                |
| Non-IMG                              | 1,734 (62.8)                           | 4,596 (73.1) | 1,701 (71.1) |                      |
| IMG                                  | 338 (12.2)                             | 1,329 (21.1) | 693 (28.9)   |                      |
| Missing                              | 691 (25.0)                             | 366 (5.8)    | 0 (0.0)      |                      |
| Primary care model                   |                                        |              |              | <.001                |
| Primarily fee-for-service            | 1,961 (71.0)                           | 2,722 (43.3) | 1,130 (47.2) |                      |
| Primarily capitation                 | 754 (27.3)                             | 3,502 (55.7) | 1,258 (52.5) |                      |
| Other                                | 48 (1.7)                               | 67 (1.0)     | 6 (0.3)      |                      |
| Patients per physician, median (IQR) | 24 (3-84)                              | 70 (28-152)  | 85 (36-178)  | <.001 <sup>b</sup>   |
| Missing (n, %)                       | 1,762 (63.8)                           | 1,659 (26.4) | 54 (2.3)     |                      |

Notes: \*Significant at P<.05.

<sup>a</sup> Calculated from three-way tests.

<sup>b</sup> Missing values were excluded from the statistical test to which the P-value corresponds.

**eTable 3.** Observed and Expected Frequency Distribution of Physicians Based on Cross-Test Score and Frequently Used Test(s)

| Cross-test score <sup>b</sup> | No. physicians |                       |                                 | Frequently used test(s) <sup>a</sup> |     |     |     |
|-------------------------------|----------------|-----------------------|---------------------------------|--------------------------------------|-----|-----|-----|
|                               | Observed       | Expected <sup>c</sup> | Relative deviation <sup>d</sup> | DEXA                                 | ECG | CXR | Pap |
| 0                             | 1023 (42.73)   | 981 (40.96)           | 0.043                           | O                                    | O   | O   | O   |
| 1                             | 276 (11.53)    | 245 (10.24)           | 0.126                           | X                                    | O   | O   | O   |
| 1                             | 180 (7.52)     | 245 (10.24)           | -0.266                          | O                                    | X   | O   | O   |
| 1                             | 203 (8.48)     | 245 (10.24)           | -0.172                          | O                                    | O   | X   | O   |
| 1                             | 271 (11.32)    | 245 (10.24)           | 0.105                           | O                                    | O   | O   | X   |
| 2                             | 46 (1.92)      | 61 (2.56)             | -0.249                          | X                                    | X   | O   | O   |
| 2                             | 40 (1.67)      | 61 (2.56)             | -0.347                          | X                                    | O   | X   | O   |
| 2                             | 53 (2.21)      | 61 (2.56)             | -0.135                          | X                                    | O   | O   | X   |
| 2                             | 121 (5.05)     | 61 (2.56)             | 0.974                           | O                                    | X   | X   | O   |
| 2                             | 51 (2.13)      | 61 (2.56)             | -0.168                          | O                                    | X   | O   | X   |
| 2                             | 38 (1.59)      | 61 (2.56)             | -0.380                          | O                                    | O   | X   | X   |
| 3                             | 27 (1.13)      | 15 (0.64)             | 0.762                           | X                                    | X   | X   | O   |
| 3                             | 15 (0.63)      | 15 (0.64)             | 0.021                           | X                                    | X   | O   | X   |
| 3                             | 12 (0.50)      | 15 (0.64)             | -0.217                          | X                                    | O   | X   | X   |
| 3                             | 28 (1.17)      | 15 (0.64)             | 0.827                           | O                                    | X   | X   | X   |
| 4                             | 10 (0.42)      | 4 (0.16)              | 1.611                           | X                                    | X   | X   | X   |

Notes: <sup>a</sup> X and O respectively indicate whether a physician in that row belongs to or does not belong to the top ordering quintile for that test.

<sup>b</sup> Represents number of tests in the top ordering rate quintile.

<sup>c</sup> Minor discrepancy in observed and expected column totals due to rounding to closest integer per cell.

<sup>d</sup> Calculated as  $(\% \text{ observed} - \% \text{ expected}) / (\% \text{ expected})$ .

**eTable 4.** Results of Mixed-Effects Multinomial Logistic Regression (n = 2,340)

| Fixed Effects                                                                                                                                                                                                                                                                                                                                                                                                                                                                                                                                                                                                                                                                                                                                                                                                                                                                                                                                                                                                                                                                   | Cross-test score  | OR <sup>a</sup> (95% CI) | IOR-80 <sup>a,b</sup> |
|---------------------------------------------------------------------------------------------------------------------------------------------------------------------------------------------------------------------------------------------------------------------------------------------------------------------------------------------------------------------------------------------------------------------------------------------------------------------------------------------------------------------------------------------------------------------------------------------------------------------------------------------------------------------------------------------------------------------------------------------------------------------------------------------------------------------------------------------------------------------------------------------------------------------------------------------------------------------------------------------------------------------------------------------------------------------------------|-------------------|--------------------------|-----------------------|
| <i>Physician-level</i>                                                                                                                                                                                                                                                                                                                                                                                                                                                                                                                                                                                                                                                                                                                                                                                                                                                                                                                                                                                                                                                          |                   |                          |                       |
| Sex, male v female                                                                                                                                                                                                                                                                                                                                                                                                                                                                                                                                                                                                                                                                                                                                                                                                                                                                                                                                                                                                                                                              | 1 v 0             | 1.08 (0.89-1.31)         | -                     |
|                                                                                                                                                                                                                                                                                                                                                                                                                                                                                                                                                                                                                                                                                                                                                                                                                                                                                                                                                                                                                                                                                 | ≥2 v 0            | 1.33 (1.03-1.73)*        | -                     |
| IMG v non-IMG                                                                                                                                                                                                                                                                                                                                                                                                                                                                                                                                                                                                                                                                                                                                                                                                                                                                                                                                                                                                                                                                   | 1 v 0             | 1.04 (0.84-1.28)         | -                     |
|                                                                                                                                                                                                                                                                                                                                                                                                                                                                                                                                                                                                                                                                                                                                                                                                                                                                                                                                                                                                                                                                                 | ≥2 v 0            | 0.65 (0.49-0.87)*        | -                     |
| Years since graduation                                                                                                                                                                                                                                                                                                                                                                                                                                                                                                                                                                                                                                                                                                                                                                                                                                                                                                                                                                                                                                                          | 1 v 0             | 1.00 (1.01-1.02)         | -                     |
|                                                                                                                                                                                                                                                                                                                                                                                                                                                                                                                                                                                                                                                                                                                                                                                                                                                                                                                                                                                                                                                                                 | ≥2 v 0            | 1.04 (1.03-1.05)*        | -                     |
| <i>Group-level</i>                                                                                                                                                                                                                                                                                                                                                                                                                                                                                                                                                                                                                                                                                                                                                                                                                                                                                                                                                                                                                                                              |                   |                          |                       |
| Primary care model <sup>c, d</sup>                                                                                                                                                                                                                                                                                                                                                                                                                                                                                                                                                                                                                                                                                                                                                                                                                                                                                                                                                                                                                                              | FHO v FHG         |                          |                       |
|                                                                                                                                                                                                                                                                                                                                                                                                                                                                                                                                                                                                                                                                                                                                                                                                                                                                                                                                                                                                                                                                                 | 1 v 0             | 0.87 (0.68-1.11)         | (0.45, 1.65)          |
|                                                                                                                                                                                                                                                                                                                                                                                                                                                                                                                                                                                                                                                                                                                                                                                                                                                                                                                                                                                                                                                                                 | ≥2 v 0            | 0.83 (0.60-1.17)         | (0.39, 1.76)          |
|                                                                                                                                                                                                                                                                                                                                                                                                                                                                                                                                                                                                                                                                                                                                                                                                                                                                                                                                                                                                                                                                                 | FHT v FHG         |                          |                       |
| 1 v 0                                                                                                                                                                                                                                                                                                                                                                                                                                                                                                                                                                                                                                                                                                                                                                                                                                                                                                                                                                                                                                                                           | 0.81 (0.63-1.04)  | (0.42, 1.55)             |                       |
| ≥2 v 0                                                                                                                                                                                                                                                                                                                                                                                                                                                                                                                                                                                                                                                                                                                                                                                                                                                                                                                                                                                                                                                                          | 0.44 (0.30-0.65)* | (0.20, 0.99)             |                       |
| No. patients per physician                                                                                                                                                                                                                                                                                                                                                                                                                                                                                                                                                                                                                                                                                                                                                                                                                                                                                                                                                                                                                                                      | 30-59 v <30       |                          |                       |
|                                                                                                                                                                                                                                                                                                                                                                                                                                                                                                                                                                                                                                                                                                                                                                                                                                                                                                                                                                                                                                                                                 | 1 v 0             | 1.14 (0.82-1.59)         | (0.54, 2.40)          |
|                                                                                                                                                                                                                                                                                                                                                                                                                                                                                                                                                                                                                                                                                                                                                                                                                                                                                                                                                                                                                                                                                 | ≥2 v 0            | 0.71 (0.45-1.13)         | (0.29, 1.71)          |
|                                                                                                                                                                                                                                                                                                                                                                                                                                                                                                                                                                                                                                                                                                                                                                                                                                                                                                                                                                                                                                                                                 | 60-109 v <30      |                          |                       |
|                                                                                                                                                                                                                                                                                                                                                                                                                                                                                                                                                                                                                                                                                                                                                                                                                                                                                                                                                                                                                                                                                 | 1 v 0             | 1.03 (0.75-1.42)         | (0.50, 2.15)          |
|                                                                                                                                                                                                                                                                                                                                                                                                                                                                                                                                                                                                                                                                                                                                                                                                                                                                                                                                                                                                                                                                                 | ≥2 v 0            | 0.91 (0.59-1.42)         | (0.39, 2.16)          |
|                                                                                                                                                                                                                                                                                                                                                                                                                                                                                                                                                                                                                                                                                                                                                                                                                                                                                                                                                                                                                                                                                 | 110-209 v <30     |                          |                       |
|                                                                                                                                                                                                                                                                                                                                                                                                                                                                                                                                                                                                                                                                                                                                                                                                                                                                                                                                                                                                                                                                                 | 1 v 0             | 0.95 (0.69-1.32)         | (0.45, 2.00)          |
| ≥2 v 0                                                                                                                                                                                                                                                                                                                                                                                                                                                                                                                                                                                                                                                                                                                                                                                                                                                                                                                                                                                                                                                                          | 0.67 (0.42-1.06)  | (0.27, 1.61)             |                       |
| >210 vs <30                                                                                                                                                                                                                                                                                                                                                                                                                                                                                                                                                                                                                                                                                                                                                                                                                                                                                                                                                                                                                                                                     |                   |                          |                       |
| 1 v 0                                                                                                                                                                                                                                                                                                                                                                                                                                                                                                                                                                                                                                                                                                                                                                                                                                                                                                                                                                                                                                                                           | 1.08 (0.78-1.50)  | (0.51, 2.26)             |                       |
| ≥2 v 0                                                                                                                                                                                                                                                                                                                                                                                                                                                                                                                                                                                                                                                                                                                                                                                                                                                                                                                                                                                                                                                                          | 0.84 (0.53-1.33)  | (0.35, 2.01)             |                       |
| <i>Random Effects<sup>a</sup></i>                                                                                                                                                                                                                                                                                                                                                                                                                                                                                                                                                                                                                                                                                                                                                                                                                                                                                                                                                                                                                                               |                   |                          |                       |
| <i>Group-level</i>                                                                                                                                                                                                                                                                                                                                                                                                                                                                                                                                                                                                                                                                                                                                                                                                                                                                                                                                                                                                                                                              |                   |                          |                       |
| Variance (SE)                                                                                                                                                                                                                                                                                                                                                                                                                                                                                                                                                                                                                                                                                                                                                                                                                                                                                                                                                                                                                                                                   | 1 v 0             | 0.04 (0.05)              |                       |
|                                                                                                                                                                                                                                                                                                                                                                                                                                                                                                                                                                                                                                                                                                                                                                                                                                                                                                                                                                                                                                                                                 | ≥2 v 0            | 0.25 (0.12)              |                       |
| MOR <sup>b</sup>                                                                                                                                                                                                                                                                                                                                                                                                                                                                                                                                                                                                                                                                                                                                                                                                                                                                                                                                                                                                                                                                | 1 v 0             | 1.21 (1.11-1.30)*        |                       |
|                                                                                                                                                                                                                                                                                                                                                                                                                                                                                                                                                                                                                                                                                                                                                                                                                                                                                                                                                                                                                                                                                 | ≥2 v 0            | 1.62 (1.38-1.85)*        |                       |
| ICC, % <sup>b,e</sup>                                                                                                                                                                                                                                                                                                                                                                                                                                                                                                                                                                                                                                                                                                                                                                                                                                                                                                                                                                                                                                                           | 1 v 0             | 1.16                     |                       |
|                                                                                                                                                                                                                                                                                                                                                                                                                                                                                                                                                                                                                                                                                                                                                                                                                                                                                                                                                                                                                                                                                 | ≥2 v 0            | 7.15                     |                       |
| <p>Notes: Significant at <math>P \leq .05^*</math>. OR = odds ratio; CI = confidence interval; IOR-80 = 80% interval odds ratio; IMG = international medical graduate; FHO = family health organization; FHG = family health group; FHT = family health team; MOR = median odds ratio. All reported values based on SAS PROC GLIMMIX output; model estimation method = Laplace; denominator degrees of freedom estimation method = between and within (bw); covariance structure = standard variance (vc).</p> <p><sup>a</sup> Adjusted for all other factors present in the model/table, as well as the quarter and season in which visit occurred.</p> <p><sup>b</sup> Estimated using group-level variance estimate.</p> <p><sup>c</sup> Represents the primary care patient enrollment model which informs group organization and remuneration.</p> <p><sup>d</sup> Suppressed comparison of 'Other v FHG' due to low observed frequency of 'Other' category.</p> <p><sup>e</sup> Calculated using the latent response formulation (i.e. let residual variance = 3.29).</p> |                   |                          |                       |

**eFigure.** Frequency Distributions for Unadjusted Physician-Level Ordering Rates for Repeat DXA Scans, ECGs, Pap Tests, and CXRs Notes: DXA = dual-energy X-ray absorptiometry; ECG = electrocardiogram; Pap = Papanicolaou; CXR = chest X-ray.

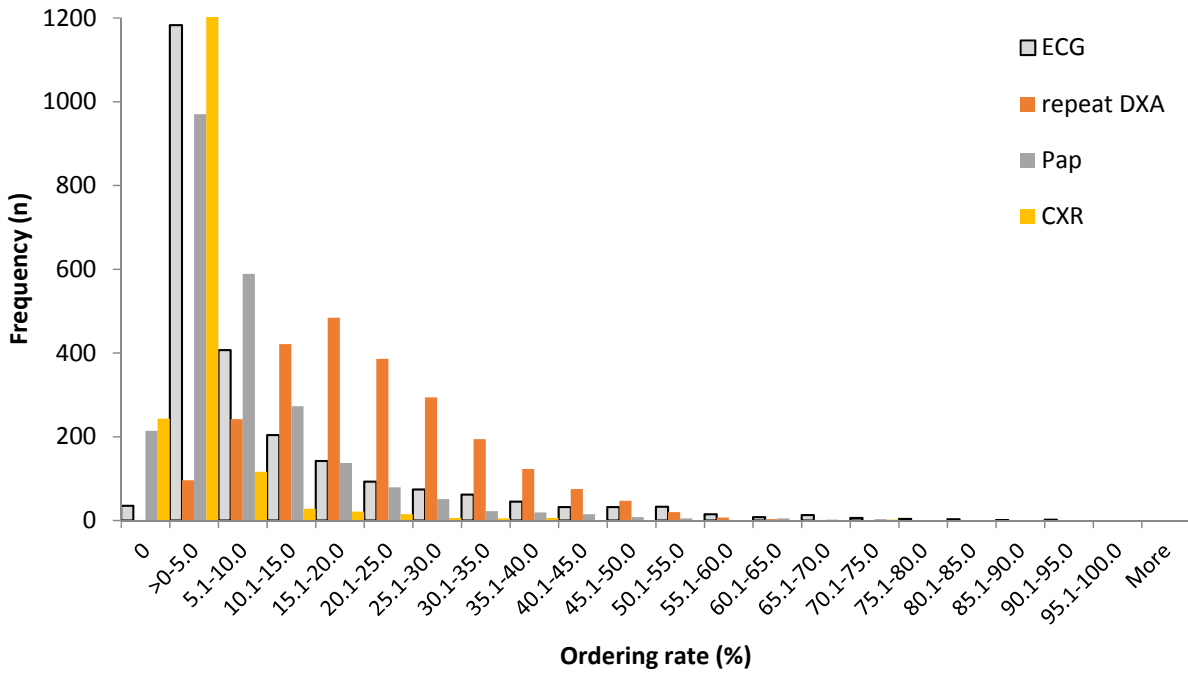

Supplement: jamanetwopen-1-e183506-s001.pdf [file jamanetwopen-1-e183506-s001.pdf]
